# Supplementary material for: Ultrasound-Promoted Greener Synthesis of Novel Trifurcate 3-Substituted-chroman-2,4-dione Derivatives and Their Drug-Likeness Evaluation
Source: Molecules. 2012 Nov 28;17(12):14146–58. doi: 10.3390/molecules171214146 (PMC6268048; doi:10.3390/molecules171214146)

# Supporting Information

## Spectra of Representative 4a

Figure S1. <sup>1</sup>H-NMR spectrum of compound 4a.

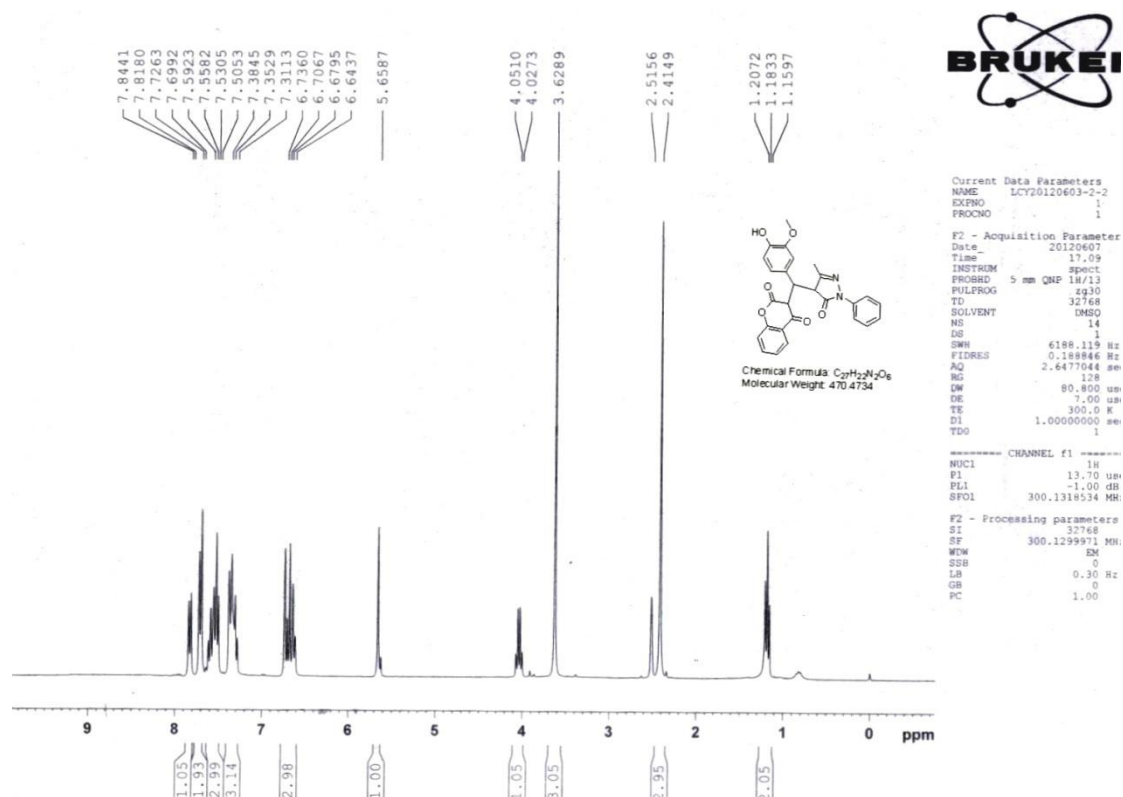

Figure S2. <sup>13</sup>C-NMR spectrum of compound 4a.

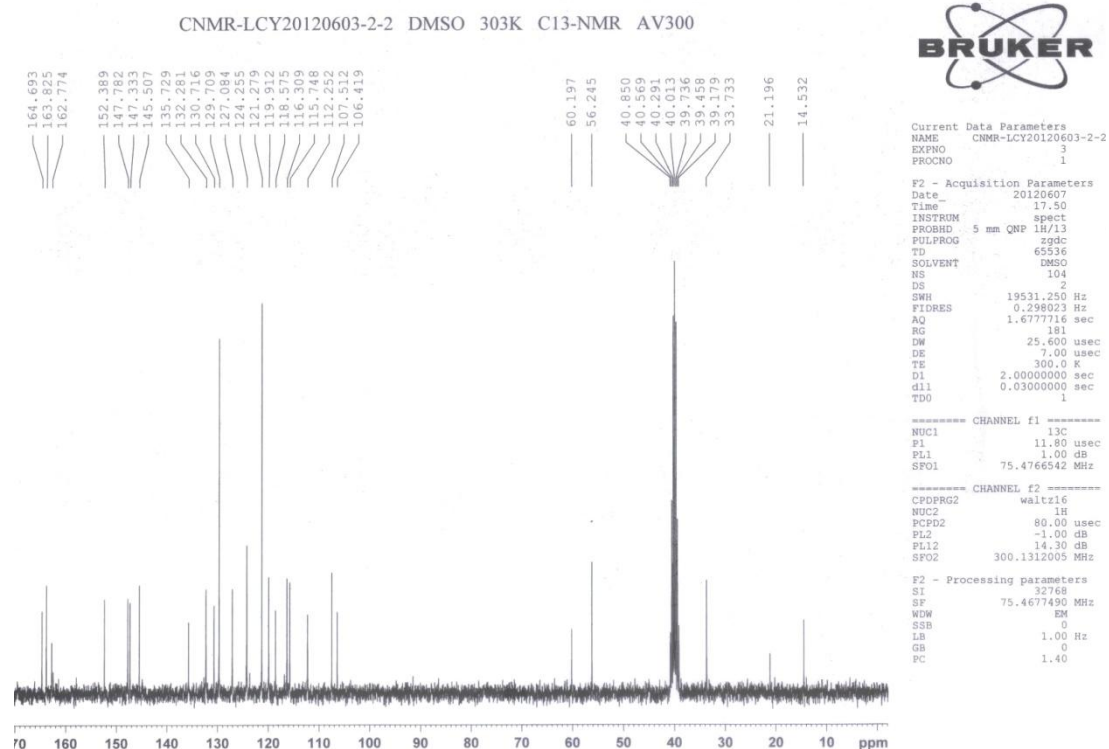

Figure S3. HSQC spectrum of compound 4a.

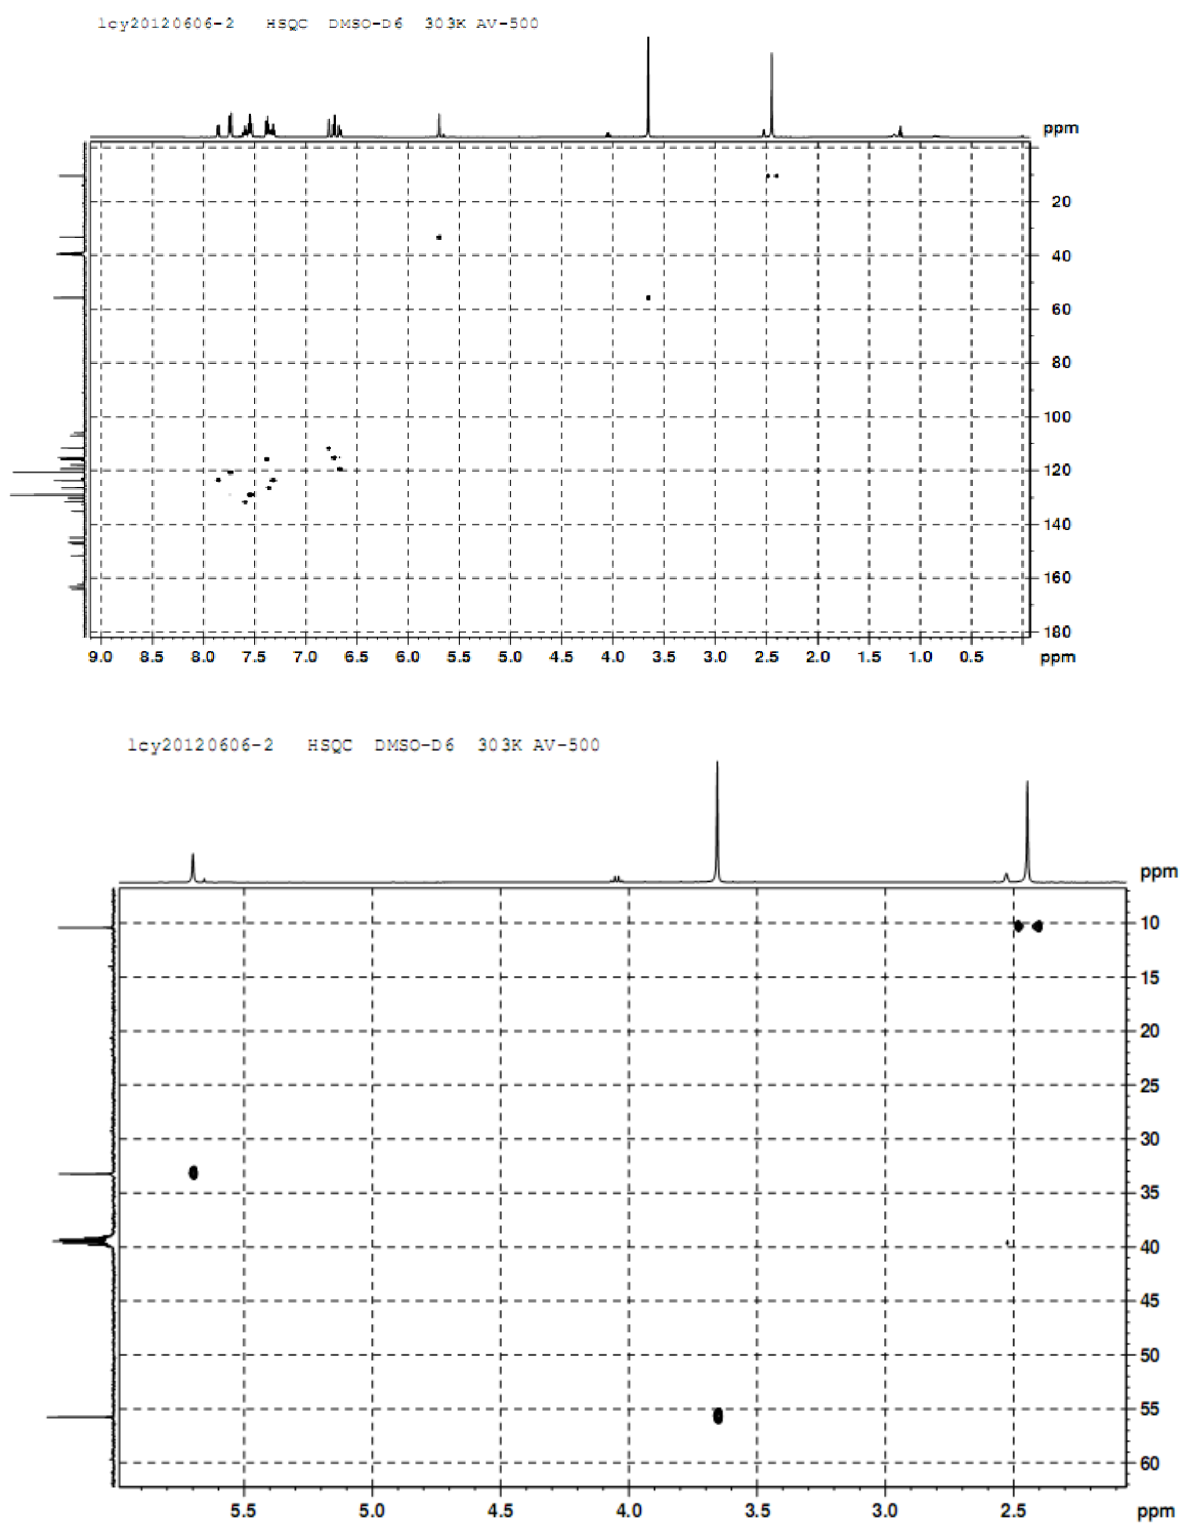

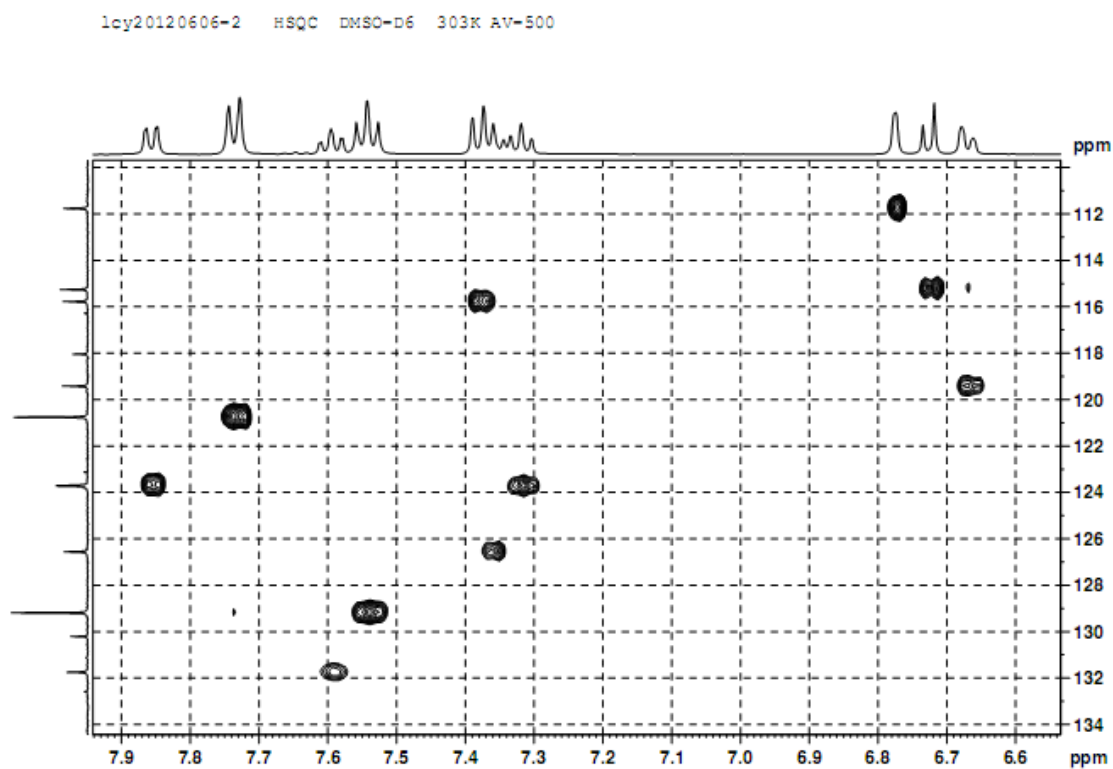

Figure S4. ROESY spectrum of compound 4a.

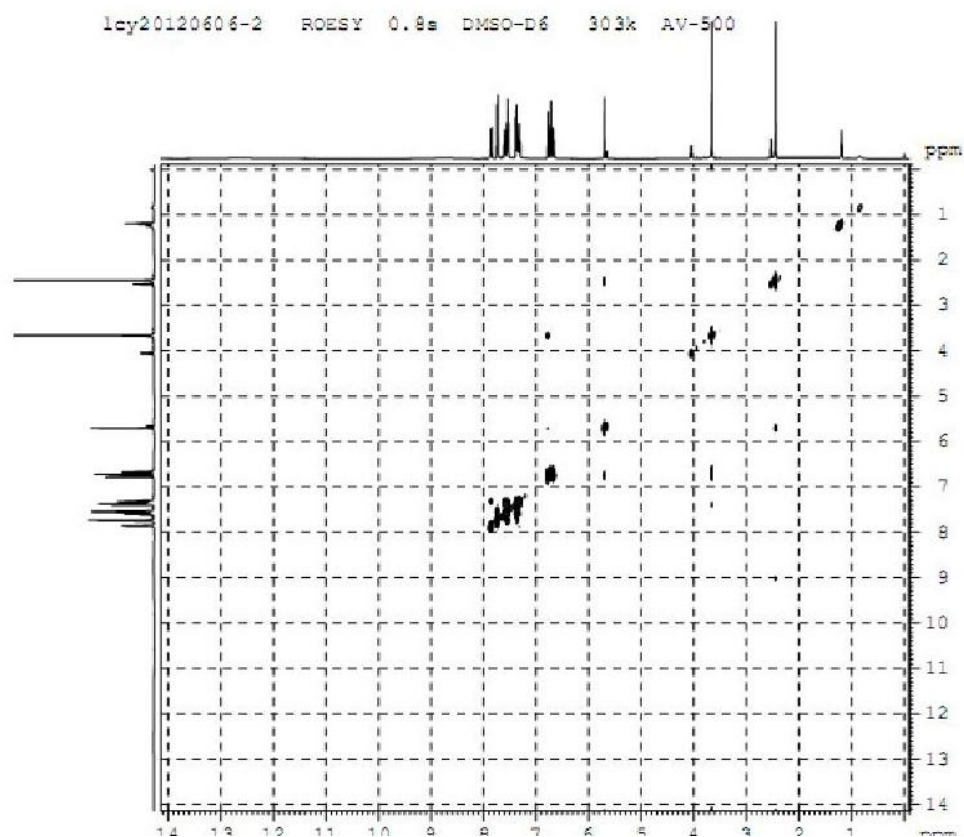

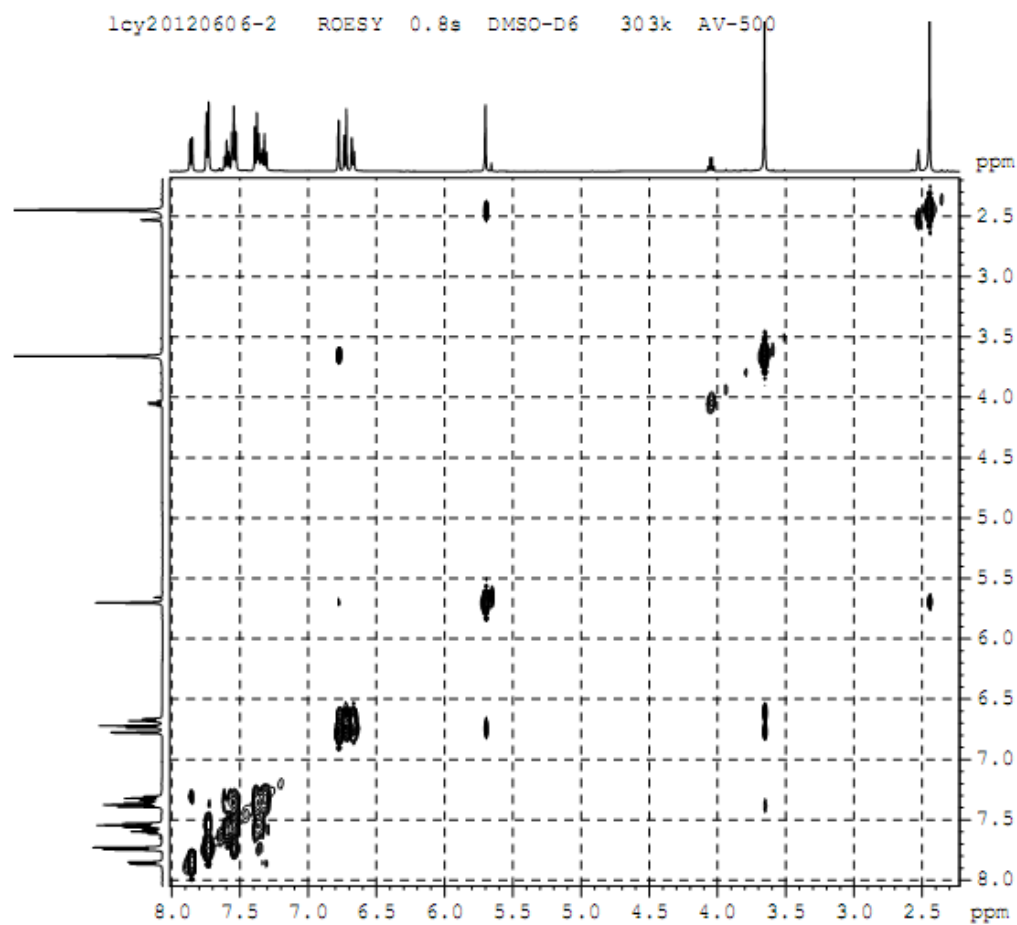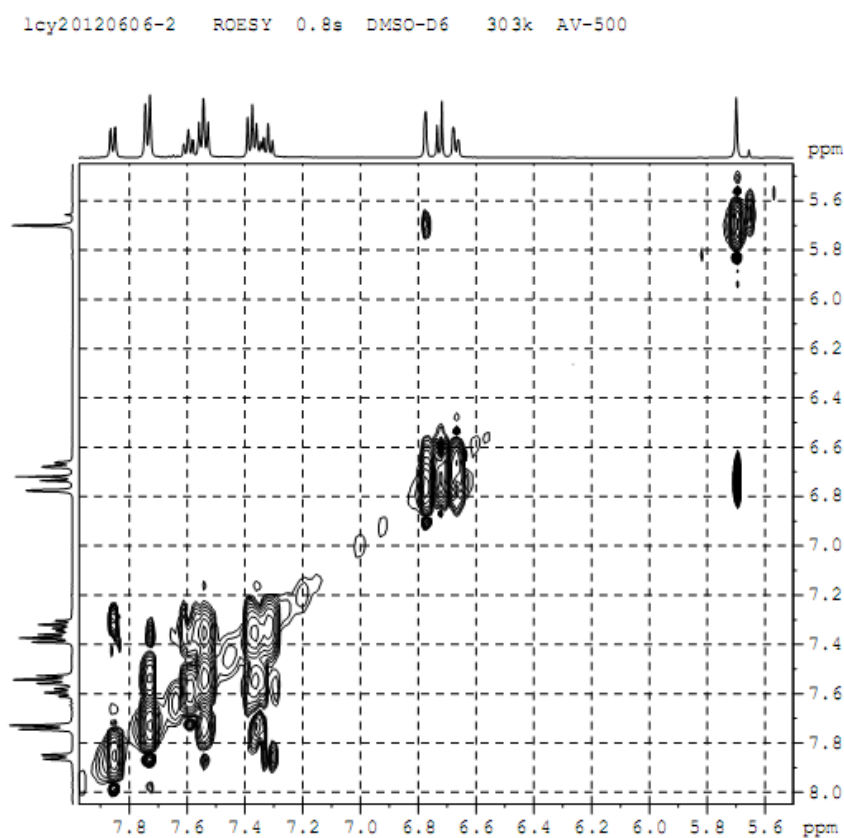

**Figure S5.** DEPT spectrum of compound **4a**.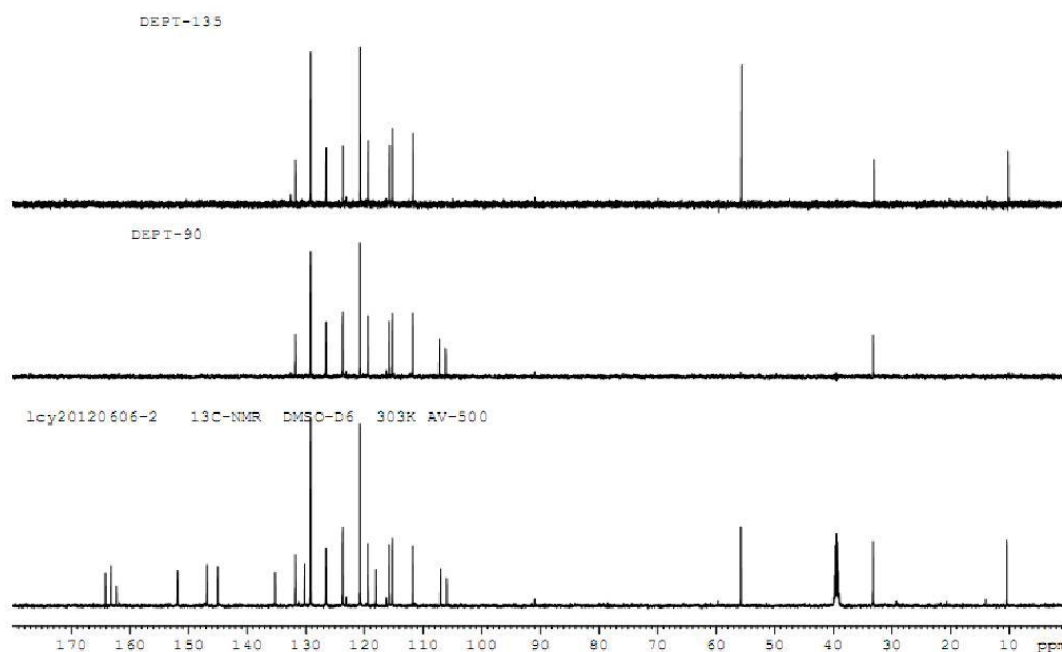**Figure S6.** H-H COSY spectrum of compound **4a**.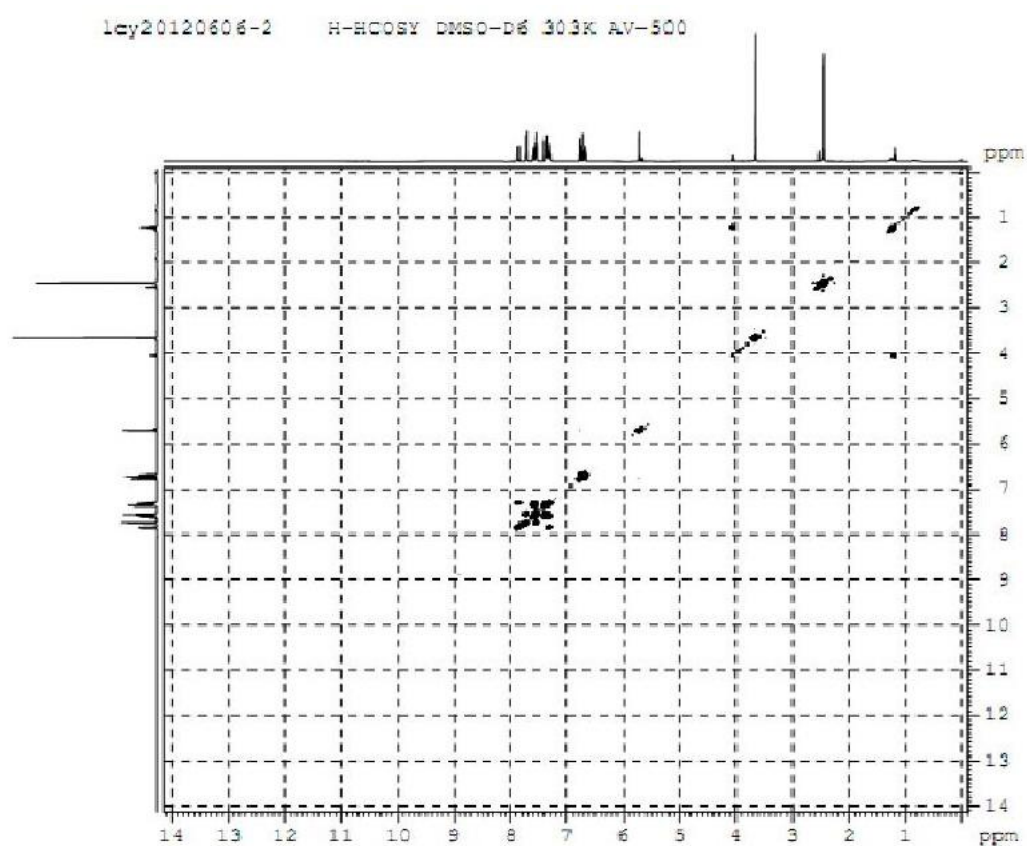

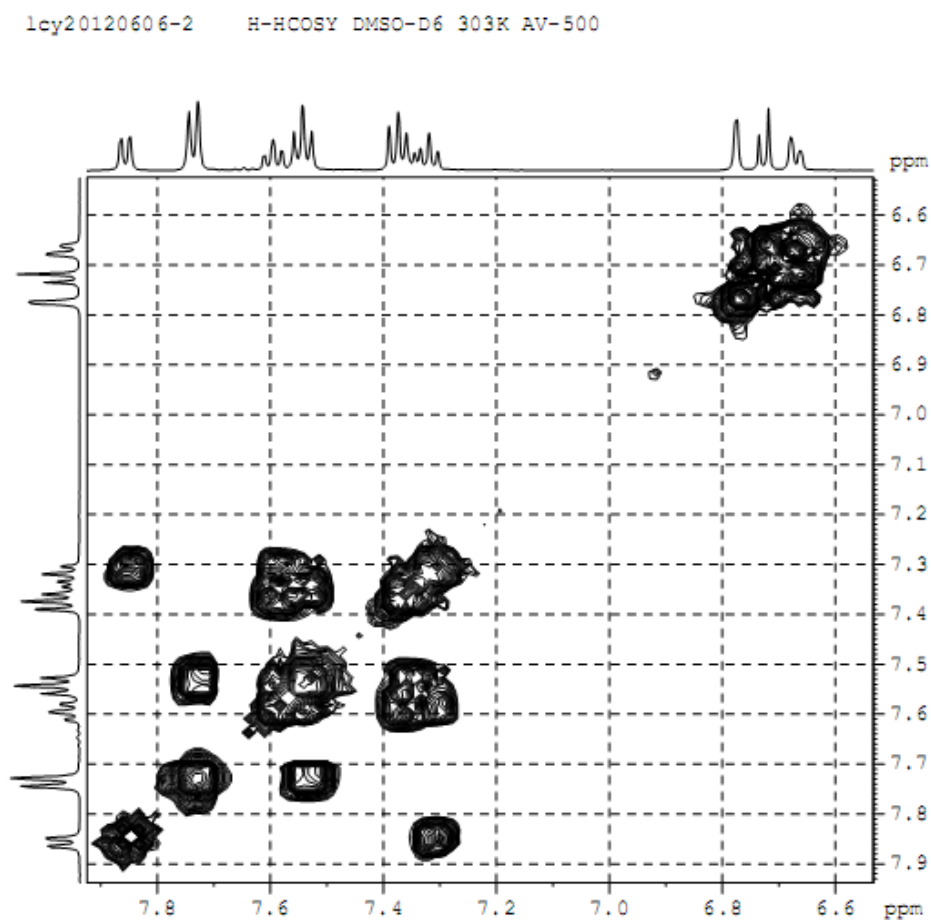

Figure S7. HMBC spectrum of compound **4a**.

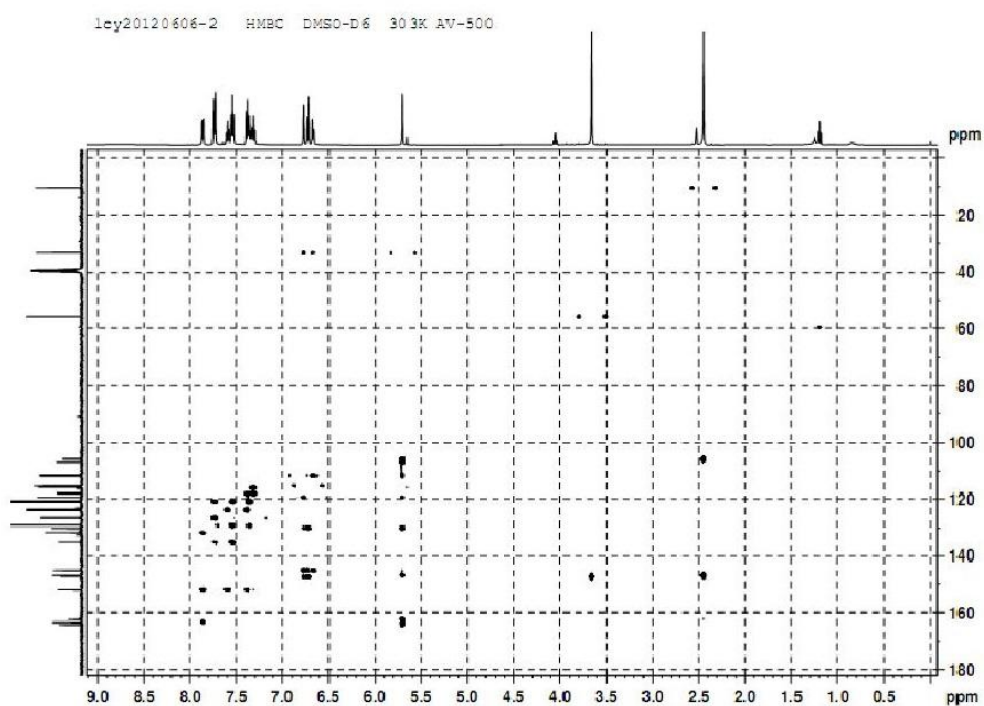

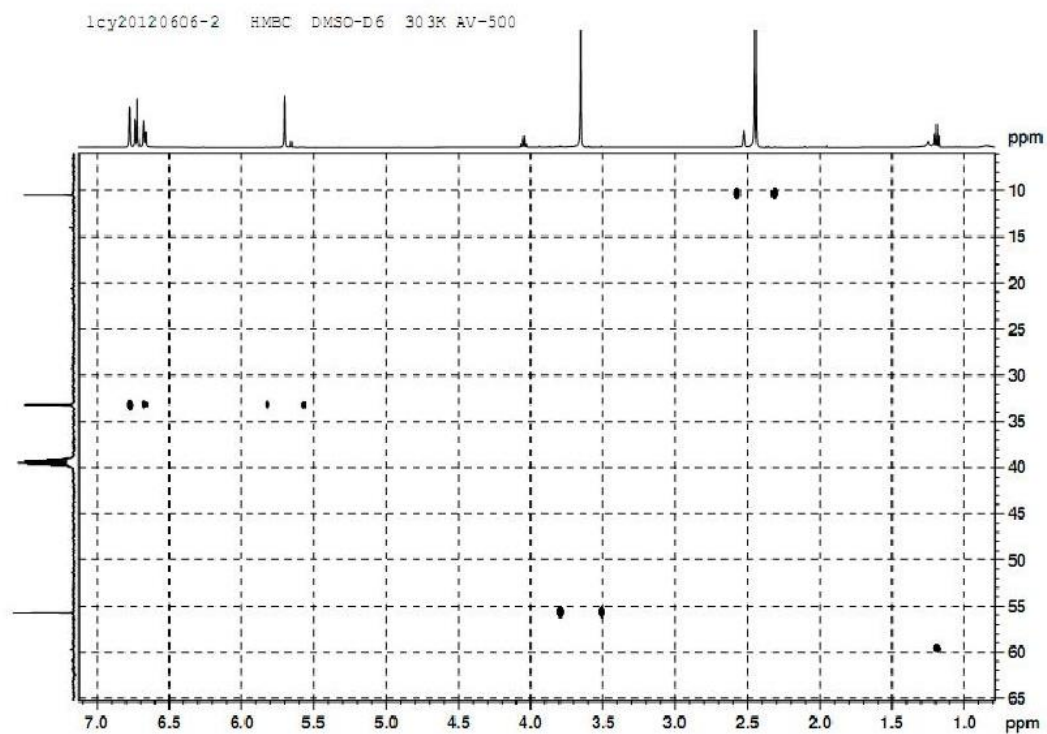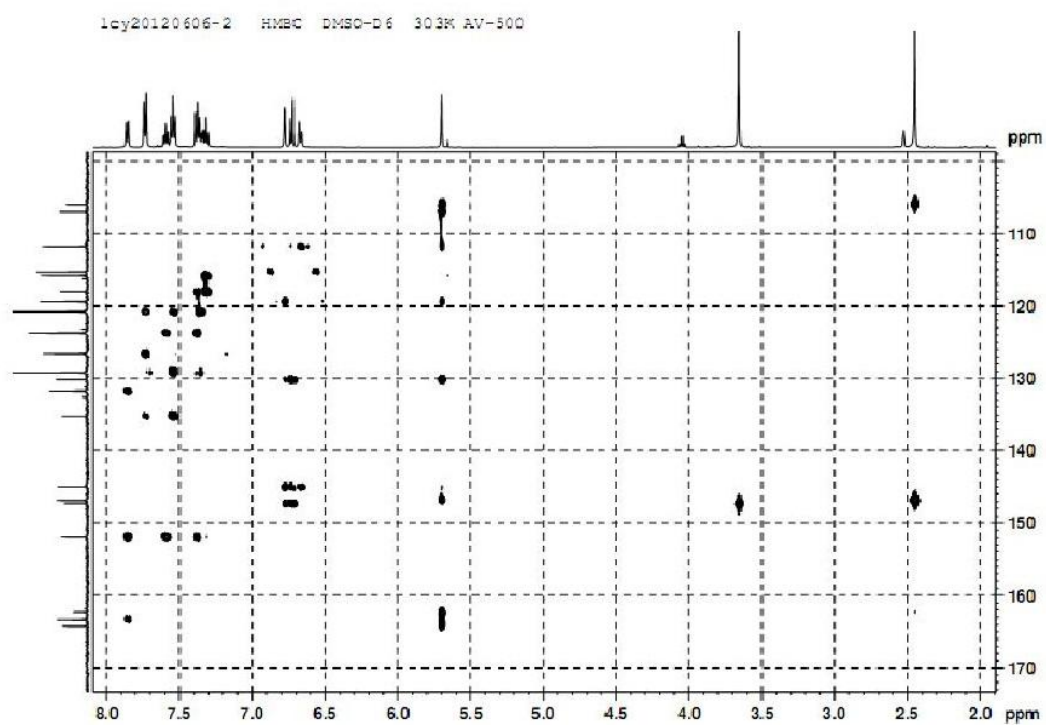

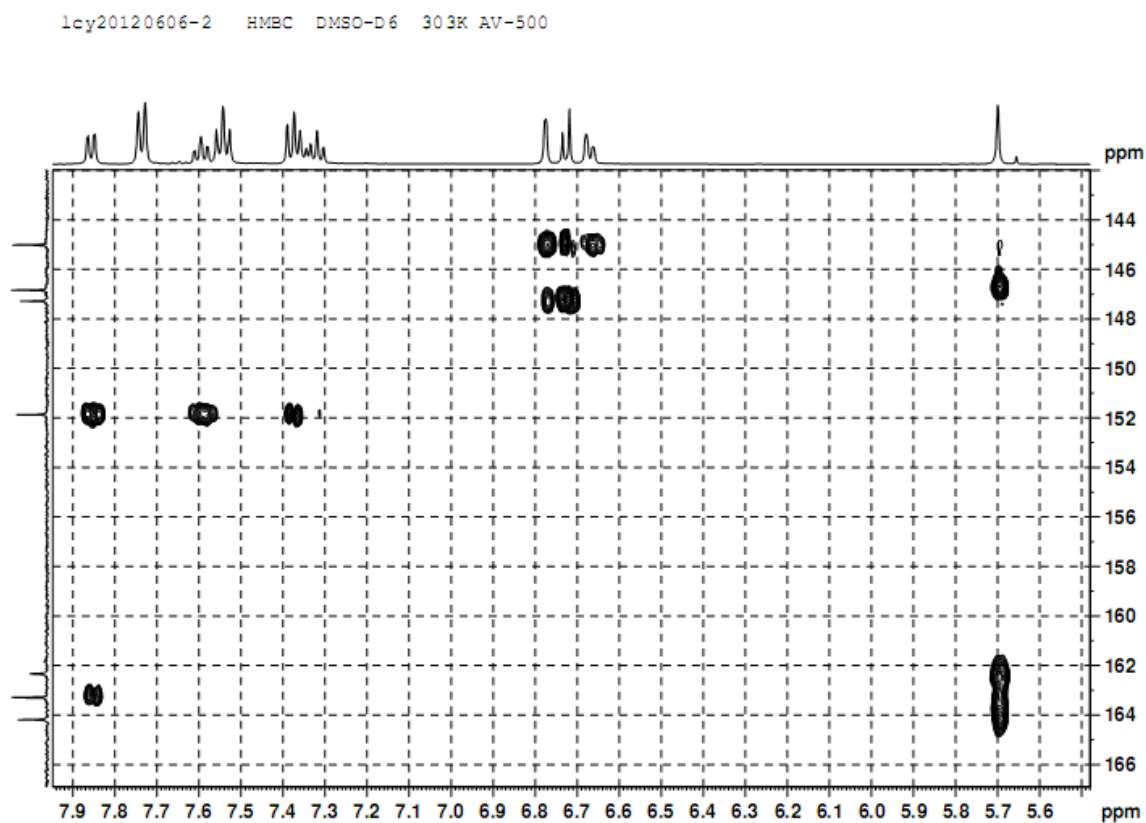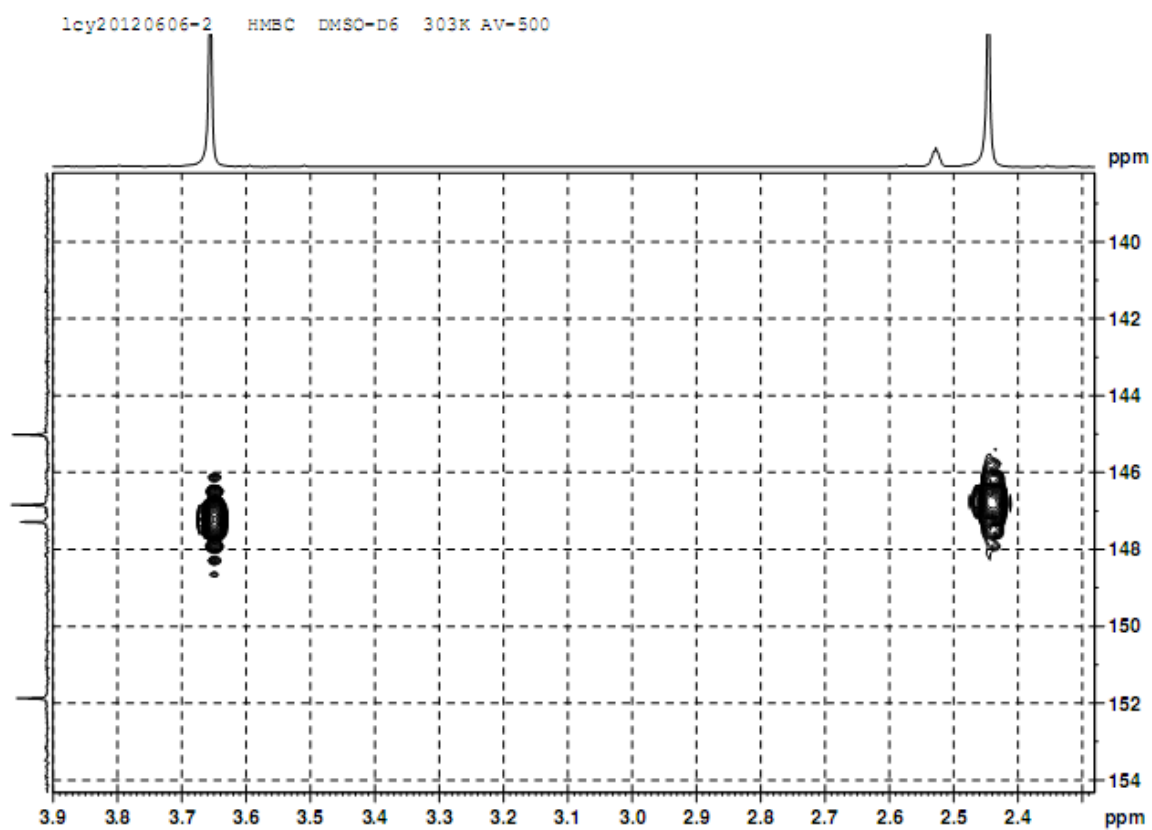

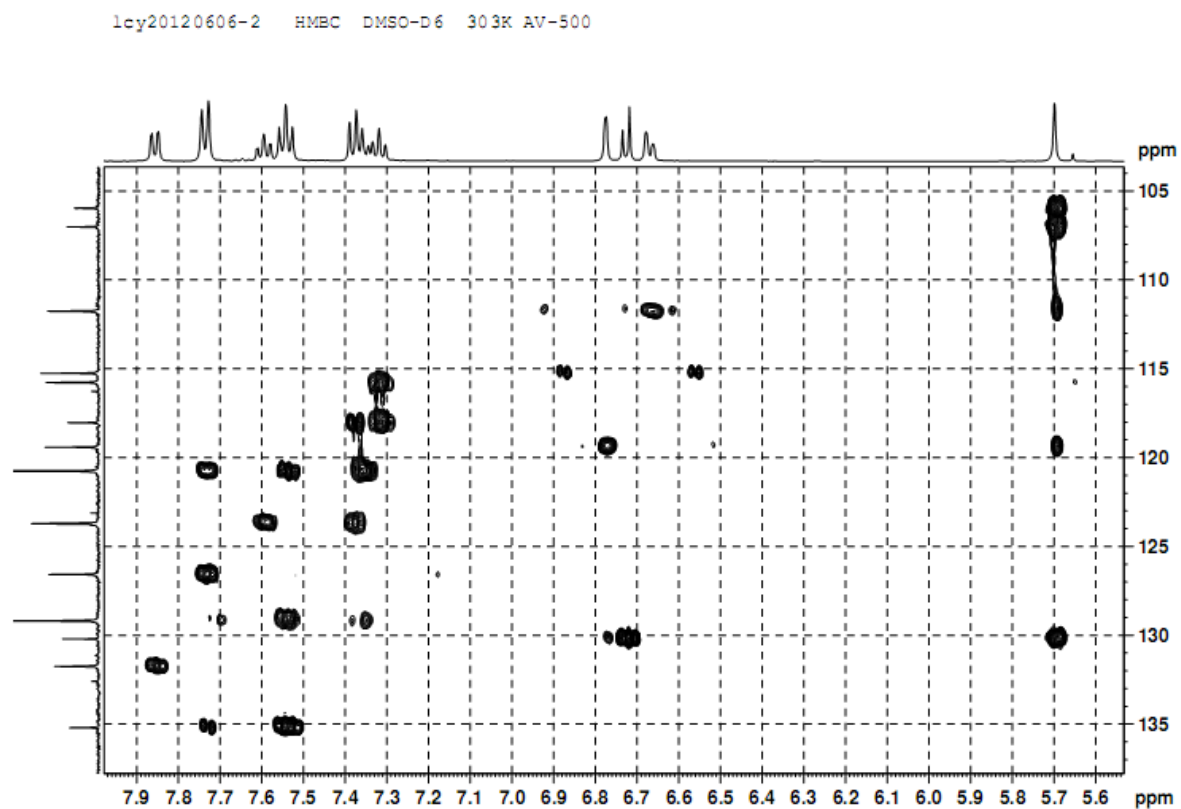

Supplement: Supplementary file 1 [file molecules-17-14146-s001.pdf]
